# Supplementary material for: A high-resolution analysis of arrestin2 interactions responsible for CCR5 endocytosis
Source: eLife. 2026 Jan 19;14:RP106839. doi: 10.7554/eLife.106839 (PMC12815460; doi:10.7554/eLife.106839)
Supplement: Figure 1—figure supplement 2—source data 1. [file elife-106839-fig1-figsupp2-data1.xlsx]

## Sheet: Sheet1
Residue	I/I0
1	0.863436
2	1.04157
3	0.923425
4	0.902576
5	1.109
6	0.820668
7	1.00299
8	0.883059
9	0.956234
10	0.957024
11	0.928058
12	0.889688
13	0.902981
14	0.897629
15	0.860148
16	0.864769
17	0.834688
18	0.929257
19	0.98765
20	0.967312
21	0.876449
22	0.910819
23	0.93197
24	0.913009
25	0.889341
26	0.851582
27	0.880876
28	0.731877
29	0.867052
30	0.938666
31	0.913753
32	0.891531
33	0.846607
34	0.88611
35	0.918673
36	0.975609
37	0.800167
38	0.897443
39	0.86129
40	0.93145
41	0.943798
42	0.969014
43	0.905303
44	0.828007
45	0.850303
46	0.821423
47	0.917785
48	0.889905
49	0.876954
50	0.866717
51	0.929683
52	0.872268
53	0.932222
54	0.915179
55	0.989147
56	0.930909
57	0.822313
58	0.929966
59	0.895577
60	0.966184
61	1.01737
62	0.912567
63	0.927761
64	0.862423
65	0.796453
66	0.97144
67	0.978805
68	0.845631
69	0.8555
70	0.884023
71	0.970812
72	0.929146
73	1.01621
74	0.95719
75	0.921082
76	0.937407
77	0.953019
78	0.830098
79	0.853709
80	0.865556
81	0.908896
82	0.803307
83	0.994521
84	0.931304
85	0.835759
86	0.819707
87	0.882171
88	1.00881
89	0.827088
90	0.73977
91	0.815164
92	0.860324
93	1.07031
94	0.889818
95	0.994519
96	0.950118
97	0.931585
98	0.826425
99	0.898413
100	1.01167
101	0.891307
102	0.914884
103	0.730045
104	0.881833
105	0.99022
106	0.881433
107	1.02652
108	0.855787
109	0.866273
110	0.949983
111	0.85967
112	0.936473
113	0.970765
114	0.860383
115	1.00672
116	0.700279
117	0.882885
118	0.894165
119	0.861032
120	0.812881
121	0.924608
122	0.834937
123	1.05273
124	0.96485
125	0.854397
126	0.9421
127	0.851066
128	0.803788
129	0.855287
130	0.908101
131	0.82752
132	0.889704
133	0.844302
134	0.990147
135	0.892269
136	0.879959
137	0.927131
138	0.95006
139	0.900348
140	1.00693
141	0.920727
142	0.873021
143	0.924061
144	0.932535
145	0.90333
146	0.93581
147	0.9681
148	0.899556
149	0.828403
150	1.05094
151	0.866017
152	0.889826
153	0.820295
154	0.870475
155	0.832897
156	0.859659
157	0.823417
158	0.920911
159	0.78822
160	0.977403
161	0.938144
162	1.06697
163	0.769451
164	0.970294
165	0.937584
166	0.843865
167	0.77858
168	1.07263
169	0.843942
E367	0.989064
N368	1.02178
E369	0.929626
T370	0.872732
V372	0.889685
D373	0.941144
T374	0.691772
N375	0.475848
L376	0.25369
I377	0.038755
E378	0.226736
L379	0.408125
D380	0.442425
T381	0.692358
D385	0.916756
I386	0.890564
