# Supplementary material for: A high-resolution analysis of arrestin2 interactions responsible for CCR5 endocytosis
Source: eLife. 2026 Jan 19;14:RP106839. doi: 10.7554/eLife.106839 (PMC12815460; doi:10.7554/eLife.106839)
Supplement: Figure 1—source data 1. [file elife-106839-fig1-data1.xlsx]

## Sheet: Sheet1
Panel C			Panel E				Panel F
Residue	I/I0 (1H-15N)		Residue	I/I0 (1H-13C)	Δδ (HC) ppm		Clathrin (μM)	Δδ (C) ppm
							0	0
E367	0.989064		I31	0.991695	0.00111111		50	0.055
N368	1.02178		I105	0.881396	0.00111111		100	0.098
E369	0.929626		I119	0.951165	0.000555556		200	0.156
T370	0.872732		I158	0.961179	0.000555556		500	0.189
V372	0.889685		I168	0.931563	0.000555556
D373	0.941144		I207	0.938446	0
T374	0.691772		I214	0.988859	0.00103786
N375	0.475848		I231	0.927076	0.00130171
L376	0.25369		I233	0.91205	0.000277778
I377	0.0230705		I241	0.921508	0.00277778
E378	0.226736		I314	0.979735	0.00138889
L379	0.477087		I317	0.918594	0
D380	0.537168		I318	0.976667	0.00428499
T381	0.692358		I377	0.415454	0.0177316
D385	0.980402		I386	0.955767	0.002
I386	0.890564
