# Supplementary material for: A high-resolution analysis of arrestin2 interactions responsible for CCR5 endocytosis
Source: eLife. 2026 Jan 19;14:RP106839. doi: 10.7554/eLife.106839 (PMC12815460; doi:10.7554/eLife.106839)
Supplement: Figure 2—source data 1. [file elife-106839-fig2-data1.xlsx]

## Sheet: Sheet1
Clathrin-N residue	I/I0 (arr2 1-393)	I/I0 (arr2 1-393 · 5x 6P)	I/I0 (arr2 1-418)	I/I0 (arr2 Δ CBL)
2	0.921514	0.734741	0.943434	0.885154
3	0.909779	0.802556	1.0033	0.75906
4	0.940364	0.826501	1.04246	0.912371
5	0.94763	0.86045	1.00852	0.825161
7	1.02102	1.12436	1.08412	0.879491
9	0.94	0.75871	0.806256	0.784669
10	0.642341	0.576347	0.821586	0.691528
12	0.525459	0.583629	0.520373	0.692805
13	0.916955	1.01012	1.0851	1.01383
14	0.803192	0.800246	0.90918	0.973258
15	0.946844	0.853107	1.0722	0.974555
16	0.795318	0.611768	0.796746	0.565052
17	0.734268	0.790715	0.951045	0.733162
18	0.872491	0.685946	0.937968	0.758333
19	0.655232	0.747395	0.811136	0.824951
20	0.684455	1.01291	0.801904	1.01141
23	0.846153	0.716778	0.896722	0.812088
24	0.795613	0.823052	0.862659	1.04387
25	0.896972	0.854977	1.00958	0.800977
26	0.813206	0.682734	0.978914	0.984957
29	0.836624	0.68137	0.723737	0.823712
30	0.73665	0.647775	0.780839	0.679599
31	0.841626	0.722694	1.0108	0.828109
32	0.829343	0.714245	0.911882	0.866891
34	0.774654	0.674057	0.890392	0.799521
35	0.732278	0.840248	0.82138	0.728783
36	0.806128	0.713246	0.879237	0.704539
37	0.836619	0.693539	0.859203	0.790671
38	0.825296	0.911481	1.00583	0.708796
39	0.576826	0.485151	0.580943	0.707544
40	0.173952	0.30052	0.327835	0.885848
41	0.641214	0.626336	0.726427	0.894827
43	0.785537	0.819697	0.855363	0.701927
44	0.958869	0.90522	1.1188	0.88827
47	0.875174	0.789372	0.943701	0.915857
48	0.552576	0.3871	0.506812	0.707007
49	0.300735	0.314703	0.296413	0.86265
50	0.427785	0.424002	0.485792	0.819104
51	0.609034	0.848778	0.976033	0.606231
52	0.706232	0.830326	0.766203	0.823686
53	0.632015	0.720038	0.769315	0.746782
55	0.880863	0.756069	1.03577	0.680326
56	0.923826	0.990949	0.967739	0.711237
57	0.607084	0.771666	0.765934	0.729916
59	0.856741	0.830275	0.986601	0.690545
60	0.849096	0.634667	0.979565	0.63609
62	0.260684	0.451207	0.365396	0.687157
63	0.547957	0.493647	0.465081	0.744641
64	0.329879	0.357703	0.35308	0.682697
66	0.291553	0.30228	0.345797	0.784662
67	0.440266	0.262695	0.104998	0.364625
68	0.168795	0.246442	0.277875	0.822143
69	0.422347	0.42615	0.536023	0.802718
70	0.331559	0.524628	0.506126	0.829264
71	0.335955	0.391808	0.379485	0.819687
72	0.448864	0.573079	0.61567	0.709131
76	0.832537	0.886091	0.87438	0.785154
77	0.56769	0.582752	0.680894	0.747942
78	0.857635	0.932495	1.0725	0.770692
79	0.658367	0.570818	0.686888	0.643675
80	0.63634	0.556343	0.547466	0.877237
81	0.5998	0.692573	0.870787	0.733929
82	0.589928	0.611608	0.562678	0.752219
83	0.19436	0.1721	0.213653	0.776377
84	0.258314	0.242517	0.26043	0.864537
85	0.275596	0.287446	0.386362	0.795376
87	0.479711	0.689105	0.617022	0.778138
88	0.250134	0.334444	0.369523	0.861782
89	0.528316	0.566579	0.647645	0.632183
90	0.329879	0.357703	0.35308	0.682697
101	0.388661	0.457545	0.513886	0.831819
102	0.451162	0.560428	0.61637	0.789821
103	0.0921081	0.117155	0.0315241	0.143498
104	0.140394	0.341171	0.261302	0.966486
105	0.0426678	0.383302	0.278881	1
106	0.356845	0.425286	0.365522	0.82472
107	0.942497	0.890769	1.03867	0.890003
108	0.26301	0.217929	0.296401	0.912973
109	0.588625	0.647199	0.723739	0.820489
110	0.760884	0.716627	0.830016	0.737732
111	0.614056	0.657492	0.73075	0.732521
115	0.834239	0.692996	0.891586	0.566501
116	0.85553	0.745974	0.935927	0.741769
117	0.918587	0.544025	0.701103	0.704486
118	0.775372	0.718549	0.848032	0.846089
120	0.912395	0.898194	1.01887	0.974505
124	0.786873	0.844391	0.94467	0.797339
125	0.726672	0.698312	0.847257	0.858715
126	0.807453	0.69611	0.917679	0.801112
131	0.735134	0.673011	0.865443	0.784742
132	0.861038	0.726694	0.924366	0.850876
133	0.712866	0.677008	0.807624	0.842603
139	0.89141	1.04907	0.838609	1.01849
140	0.800325	0.805892	0.953575	0.751522
143	0.837595	0.761274	0.938389	0.887015
144	0.830375	1.01126	1.04198	0.836566
145	0.856972	0.837009	1.03741	0.862175
147	0.868755	0.908506	1.03057	0.803271
148	0.842131	0.699067	0.819506	0.896088
151	0.766653	0.745645	0.878587	0.826189
152	0.945028	0.985213	1.12552	0.748613
153	0.853969	0.807602	1.03942	0.8865
155	0.486868	1.06704	0.851921	0.929772
156	0.71326	0.657528	0.832977	0.72911
158	0.966979	0.981879	1.11322	1.08377
159	0.298858	0.327185	0.271263	0.891347
160	0.87676	0.730414	0.948947	0.863079
161	0.91248	0.870512	0.926854	0.843547
162	0.882814	0.781939	0.996932	0.751513
163	0.478659	0.837157	0.619	0.437268
171	0.928692	0.789334	1.01016	0.781108
172	0.844199	0.740269	0.968193	1.03876
173	0.94018	0.799896	1.03568	0.926523
176	0.869574	0.709409	0.938371	0.742529
177	0.953071	0.780275	1.03028	0.773699
179	0.801333	0.828951	0.988295	0.762965
180	0.701578	0.976854	0.831466	0.938812
181	0.980739	0.869809	0.544406	1
185	0.612375	0.591676	0.632256	0.701608
186	0.820294	0.830151	0.943528	0.696809
187	0.76747	0.720677	0.939375	0.75226
188	0.618332	0.659795	0.761318	0.671558
189	0.755503	0.78721	0.971762	0.791351
190	0.892825	0.792484	0.886376	0.796603
191	0.18723	0.12172	0.157939	0.346384
192	0.882892	0.933175	1.03858	0.743497
194	1.1998	0.862496	0.735334	0.452209
195	0.908837	0.808183	1.044	0.842284
197	0.867585	1.01185	1.03933	0.66943
198	0.740348	0.975759	0.906711	0.713193
199	0.816266	0.874101	0.838899	0.952199
201	0.781352	0.799392	0.881983	0.810466
203	0.972542	0.924111	0.996533	0.900955
205	0.937968	0.972262	1.00655	0.830046
206	0.826993	0.633218	0.879582	0.621082
207	0.86519	0.743227	0.955948	0.778911
209	0.91807	0.774055	0.964025	0.911742
210	0.742236	0.750515	0.850545	0.74312
211	0.809129	0.692796	0.831105	0.67215
212	0.768998	0.85307	0.952759	0.541239
213	0.526754	1.10173	0.514587	0.848792
214	0.862059	0.786011	1.06913	0.868268
221	0.877145	0.865948	0.939245	0.846179
222	0.799719	1.09248	0.743	0.502719
225	0.80133	0.714217	1.08245	0.698998
226	0.900382	0.788305	1.00359	0.939907
227	0.777881	0.600033	0.771005	0.882814
228	0.789702	0.728522	0.895203	0.666004
232	0.475915	0.61984	0.7049	0.957618
233	0.920883	0.981706	0.98946	1.06445
234	0.929626	1.01238	0.930831	0.89325
235	0.928092	0.717362	1.03025	0.626897
238	0.73904	0.675622	0.915128	0.710617
240	0.827071	0.618984	0.806709	0.661756
241	0.876793	0.889198	1.01253	0.870505
243	0.817951	0.848694	0.957741	1.00474
245	0.650187	0.655968	0.774524	0.833373
246	1.04663	1.16546	1.11824	0.603632
247	0.9254	0.870361	1.02476	0.916782
248	0.930034	1.03079	1.03826	1.13488
249	0.881919	1.13833	0.976292	0.953601
250	0.916969	0.984926	1.05001	0.728585
251	0.860773	0.816066	0.931674	0.837251
252	0.978533	0.971357	1.02017	0.867044
255	0.644669	0.782484	0.806201	0.760588
256	0.837964	0.661867	0.945297	0.875532
257	0.79749	0.651008	0.898019	0.766397
259	0.797668	0.542072	0.852435	0.704383
260	0.838426	0.781699	0.964282	0.837146
263	0.948603	0.902721	1.13166	0.889281
264	0.935535	0.910483	1.0779	1.03625
266	0.840374	0.813163	0.942236	0.631903
267	0.881699	0.968085	0.960719	0.675539
268	0.576028	0.621927	0.759466	0.739093
269	0.818144	0.755106	0.905852	0.822531
278	0.82048	1.04785	0.492334	0.437704
279	0.877189	0.770272	0.803835	0.615374
280	0.790472	0.867797	0.953744	1.06805
286	0.82385	0.702478	0.874016	0.714765
288	0.606198	0.948223	0.642887	1.07283
290	0.807781	0.729647	0.770152	0.737534
291	0.92614	0.87987	0.910853	0.93303
292	0.790328	0.725888	0.857937	1.01303
293	0.736851	0.608493	0.830018	1.00596
294	0.791245	1.18075	0.857046	0.736785
295	0.910571	1.04301	1.05588	0.781894
296	1.08069	1.09872	1.1713	0.646951
301	0.766653	0.745645	0.878587	0.826189
302	0.95702	0.725133	0.734937	1.04816
303	0.828924	0.822095	0.952653	0.885459
304	0.825584	0.594827	0.817767	0.751036
305	0.66216	0.63399	0.716002	0.731836
306	0.780746	0.675321	0.930065	0.763913
307	0.793869	0.795388	0.984282	0.79497
309	0.807061	0.794894	0.864246	0.710199
310	1.20371	1.10005	1.19133	0.334017
311	0.737028	0.634073	0.884291	0.917279
313	0.820377	0.856862	0.986638	1.02994
314	0.994396	0.884779	1.07142	0.998823
315	0.866274	0.816763	0.950679	0.94133
316	0.850051	0.710285	0.960682	0.846553
317	0.872361	0.798757	0.845455	1.07774
318	0.883437	0.86535	0.989108	0.850302
319	1.02161	1.01621	1.03345	1.02729
320	0.911435	0.799361	0.929603	0.853756
321	0.783439	0.824734	0.843858	0.780214
322	0.78175	0.804059	0.925579	0.819512
323	0.91426	0.986543	1.07637	0.970188
324	0.876351	0.922357	1.01025	0.979758
325	0.785477	0.828027	0.926348	0.83802
326	0.832957	0.646487	0.827452	0.895146
327	0.828666	0.750943	0.841449	0.910303
328	0.890671	0.862134	1.0336	0.625364
329	0.578032	0.687936	0.607172	1
330	0.913324	1.04045	1.08762	0.902511
331	0.848177	0.78031	1.00596	0.646647
332	0.853301	0.668727	0.901012	0.620652
333	0.92982	0.756033	0.938501	0.795525
334	0.838202	0.64977	0.940291	0.824025
337	0.929909	0.924087	1.07743	0.810851
338	0.804196	0.960169	1.127	1.0749
339	0.800163	0.758896	0.836005	0.602979
340	0.859369	0.758605	0.868603	0.762096
341	0.932711	0.817822	0.910538	0.847135
342	0.794972	0.882639	0.866984	1.17474
343	0.891572	1.11454	1.17932	0.886012
344	0.872158	0.80062	0.741575	1.17313
346	0.923029	0.678627	1.03922	1.05785
347	0.80572	0.767891	0.953113	0.84636
348	0.864308	1.00843	0.930248	0.889747
349	0.83793	0.657466	0.934921	0.796623
350	0.856137	0.899016	0.970881	0.746572
351	0.904005	0.970443	0.896033	0.803626
352	0.677466	0.624466	0.648734	0.590795
353	0.923775	0.878962	1.04019	0.991364
354	0.775247	0.659152	0.797901	0.707531
355	0.832095	0.73661	0.931527	0.745707
356	0.883607	0.790434	0.918656	0.821539
357	0.865871	0.76859	0.97213	0.817437
358	1.03612	1.01249	1.15147	0.780485
359	0.820008	0.872653	0.909551	0.809072
360	0.851229	0.818807	0.893212	0.723627
361	0.976304	0.799274	1.04375	0.892446
362	0.811501	0.76644	1.11043	0.883207
