# Supplementary material for: A high-resolution analysis of arrestin2 interactions responsible for CCR5 endocytosis
Source: eLife. 2026 Jan 19;14:RP106839. doi: 10.7554/eLife.106839 (PMC12815460; doi:10.7554/eLife.106839)
Supplement: Figure 3—source data 1. [file elife-106839-fig3-data1.xlsx]

## Sheet: Sheet1
Residue	I/I0 (arr2 1-418)	I/I0 (arr2 1-418 · CCR5pp6)
701	na	na
702	na	na
703	0.879849	0.733595
705	0.964189	0.808724
706	0.9607	0.792816
707	0.870852	0.492685
708	0.994927	0.707752
709	0.891251	0.640834
711	0.923711	0.566126
712	0.910095	0.606534
713	0.924668	0.577032
714	0.997251	0.636422
717	0.840472	0.628807
718	0.935317	0.594413
719	1.04113	0.502894
720	0.894851	0.505481
721	0.915296	0.532676
722	0.974315	0.600642
723	0.847071	0.643659
731	0.857103	0.486442
732	0.918398	0.736184
733	0.823771	0.472671
734	1.03234	0.623093
735	0.941591	0.711941
736	0.829448	0.622688
744	0.975187	0.801601
745	0.909254	0.752528
746	0.952943	0.777371
747	0.985084	0.595186
748	0.796596	0.745039
750	0.941202	0.780521
751	0.834678	0.601109
752	0.961402	0.55399
753	0.99539	0.6918
754	0.972956	0.823638
755	0.852211	0.581092
756	0.935961	0.66489
757	0.826838	0.553268
758	1.09584	0.575714
759	0.904088	0.469526
760	0.874178	0.477028
761	0.887888	0.545987
762	0.848839	0.398899
763	0.86315	0.501866
764	0.842464	0.48034
765	1.05238	0.689841
767	0.873362	0.539439
770	0.830047	0.517823
771	0.906232	0.641921
772	0.985381	0.724665
773	0.99976	0.659653
774	0.93567	0.523618
	0.911444	0.725879
780	0.895087	0.746776
781	0.945315	0.584496
784	0.949905	0.588663
785	0.818078	0.557021
786	1.05714	1.0076
788	0.938689	0.628061
	0.860465	0.605665
790	0.900368	0.513573
791	0.938689	0.628061
792	0.951156	0.703829
794	1.00396	0.646471
795	0.836461	0.711438
800	0.930337	0.511402
801	0.914531	0.481862
802	0.930426	0.568526
803	1.01376	0.999456
804	0.898572	0.652649
809	0.82155	0.473715
810	0.758638	0.542228
811	0.949593	0.553886
812	1.05484	0.643191
813	0.939639	0.794161
816	1.0178	0.886543
817	0.90522	0.618727
818	0.852915	0.604226
819	0.527791	0.543911
826	1.01818	0.886543
827	0.657894	0.410399
828	0.808735	0.671153
829	0.903607	0.474485
830	0.927747	0.487602
831	0.930379	0.104948
832	1.01952	0.0420777
833	0.986734	0.596786
834	0.644195	0.104779
835	0.815886	0.0727723
836	0.768079	0.165802
837	0.817045	0.163624
838	0.93247	0.0445406
839	0.932301	0.281609
840	0.788479	0.0792754
841	0.826166	0.107354
842	0.873086	0.0203059
843	0.996238	0.62687
844	0.881711	0.560476
846	0.851654	0.101442
847	0.715946	0.219593
848	0.930337	0.511402
849	0.841881	0.341775
850	0.856043	0.651442
851	0.931439	0.68416
852	0.907951	0.619792
853	0.929422	0.624338
854	0.917618	0.521326
855	0.911531	0.608384
856	0.864205	0.618297
857	0.877939	0.394892
859	0.883198	0.462282
860	0.902461	0.715183
861	0.846659	0.666468
862	1.01101	0.564259
864	0.924324	0.67289
865	0.963042	0.41764
866	0.989667	0.460475
867	1.0178	0.886543
868	0.944465	0.445858
869	0.916908	0.544022
870	0.87711	0.542022
874	0.951313	0.0589413
875	0.685655	0.894771
876	0.855452	0.413551
877	0.84431	0.184598
878	0.951313	0.0394413
879	0.834609	0.291083
881	0.861107	0.105504
882	0.892286	0.806612
883	0.878124	0.10982
884	0.919443	0.356988
885	0.900741	0.666884
886	0.846659	0.666468
887	0.966285	0.185279
888	0.951313	0.0394413
889	0.966889	0.934078
890	1.00703	0.122804
892	0.823771	0.472671
893	0.834412	0.573609
894	0.925368	0.62851
895	0.772196	0.514921
896	0.974665	0.562192
897	0.894468	0.608617
898	0.872846	0.479831
901	0.972956	0.823638
902	1.19575	0.381246
903	0.8152	0.146231
904	0.812064	0.697577
905	0.775388	0.406043
906	0.869761	0.567045
909	0.963573	0.50264
911	0.932251	0.754736
912	0.949915	0.288111
913	0.939825	0.114405
914	0.8152	0.146231
915	1.07395	0.166945
916	0.914401	0.533339
917	1.16684	0.556429
918	0.838979	0.225257
919	0.969994	0.200505
920	0.938986	0.156781
922	0.842093	0.403113
923	0.945315	0.584496
924	0.966554	0.578839
925	0.873975	0.188027
926	0.78026	0.490307
928	0.951313	0.0394413
929	0.796596	0.745039
930	0.937756	0.556111
935	1.0088	0.599975
936	0.929422	0.624338
937	na	na
