# Supplementary material for: A high-resolution analysis of arrestin2 interactions responsible for CCR5 endocytosis
Source: eLife. 2026 Jan 19;14:RP106839. doi: 10.7554/eLife.106839 (PMC12815460; doi:10.7554/eLife.106839)
Supplement: Figure 4—source data 1. [file elife-106839-fig4-data1.xlsx]

## Sheet: Sheet1
Panel D						Panel E				Panel F
No ligand	[5P12]CCL5	CCL5	[6P4]CCL5			CCR5+PUNCTA	CCR5+ARR2+ PUNCTA			Distance_(microns)	Intensity a.u. (CCR5)	Intensity a.u. (arr2-YFP)
0	0.014	0.374	0.932			19	15			0	10.2894	6.3961
0.022	0.007	0.797	0.83			12	18			0.1091	11.2244	6.8748
0	0.095	0.788	0.663			8	10			0.2183	12.8096	7.5437
0.033	0.402	0.003	0.813			14	10			0.3274	15.3349	7.8586
0.336	0	0.0341	0.611			12	14			0.4365	17.8693	8.6664
0	0.139	0.319	0.934			18	10			0.5456	19.7895	9.6614
0.049	0.374	0.775	0.56			10	8			0.6548	20.2381	10.6759
0.071	0.053	0.353	0.774			14	17			0.7639	20.708	11.3362
0.067	0.249	0.665	0.353			16	12			0.873	20.8831	12.5519
0.0257	0.067	0.512	0.376			13	11			0.9821	20.9836	13.3745
0.028	0	0.747	0.169			18	15			1.0913	21.663	13.6736
0.115	0.124	0.861	0.627			11	12			1.2004	22.1807	14.3948
0.029	0	0.799	0.613			16	20			1.3095	23.8271	15.2111
0	0	0.488	0.797			8	12			1.4187	24.3046	15.8735
0	0.123	0.573	0.443			10	9			1.5278	24.4186	16.1313
0.031	0.042	1	0.809			14	14			1.6369	24.0541	17.1512
0	0.152	0.962	0.836			9	11			1.746	23.007	17.975
0.048	0	0.869	0.964			17	11			1.8552	23.0487	18.5095
0.021	0.034	0.521	0.412			12	14			1.9643	22.8092	18.9388
0.002	0.412	0.752	0.538			11	10			2.0734	22.8085	19.1933
0.044	0.062	0.778	0.543			12	10			2.1825	22.67	20.4304
0.09	0.183	0.301	0.425			11	14			2.2917	21.3138	21.5623
0.007	0.048	0.367	0.843			11	13			2.4008	20.161	22.1581
0.007	0.029	0.573	0.811			12	12			2.5099	20.4882	21.9925
0.024	0.05	0.293	0.992			14	10			2.619	20.7232	21.6406
0.31	0	0.642	0.609			17	15			2.7282	21.286	21.7303
0.293	0.009	0.536	0.813			13	13			2.8373	21.9049	21.1287
0.321	0.08	0.708	0.816			11	14			2.9464	22.9295	20.3035
0.039	0.218	0.614	0.327			10	9			3.0556	23.9784	20.4342
0.044	0.026	0.962	0.57			8	12			3.1647	25.0489	21.1508
0.005	0.218	0.742	0.717			12	9			3.2738	26.8534	22.8919
0.02	0.142	0.818	0.535			11	10			3.3829	29.5462	26.2762
0	0.018	0.865	0.74			15	9			3.4921	35.2522	31.7034
0	0.063	0.893	0.848			12	10			3.6012	46.4045	39.8997
0.123	0.055	0.825	0.983			13	11			3.7103	58.8927	51.0451
0.08	0.233	0.708	0.878			10	11			3.8194	67.6188	66.7873
0.213	0.073	0.724	0.863			13	18			3.9286	68.5978	81.504
0	0	0.678	0.986			11	19			4.0377	64.9699	90.3829
0.256	0.055	0.839	0.899			17	11			4.1468	59.1806	93.6815
0.11	0.033	0.818	0.901			18	10			4.256	51.6715	89.5209
0.132	0	0.954	0.822			14	9			4.3651	44.4348	82.0637
0.008	0.444	0.935	0.926			19	15			4.4742	35.3561	71.2738
0.263	0.001	0.898	0.739			8	12			4.5833	29.0792	57.8929
0.445	0.111	0.995	0.646			12	10			4.6925	26.5584	45.6096
0.011	0.236	0.803	0.865			12	9			4.8016	24.4741	35.543
						14	7			4.9107	23.8252	29.5754
						11	12			5.0198	23.0121	24.349
						13	7			5.129	22.3274	21.309
						16	13			5.2381	22.2381	20.6509
						16	14			5.3472	22.6839	20.4593
						8	11			5.4563	23.512	22.2571
						12	17			5.5655	28.4609	24.6313
						9	17			5.6746	35.2324	28.9888
						10	12			5.7837	41.912	36.2216
						9	15			5.8929	44.4832	43.329
						6	12			6.002	40.7679	48.3994
						9	18			6.1111	35.2562	47.2245
						11	14			6.2202	29.5627	40.8204
						10	13			6.3294	25.4053	32.7109
						13	10			6.4385	22.9313	27.5546
						11	10			6.5476	20.6554	24.5036
						10	14			6.6567	19.3672	21.2737
						14	13			6.7659	18.6803	20.0791
						12	17			6.875	18.3568	19.2993
						11	15			6.9841	18.0055	20.0932
						13	12			7.0933	18.08	20.5846
						15	15			7.2024	19.2565	21.1931
						18	9			7.3115	21.9023	22.1943
						19	9			7.4206	23.2115	23.0198
						11	11			7.5298	23.0656	24.5223
						20	18			7.6389	21.9747	24.9548
						15	12			7.748	19.0312	25.9622
						11	15			7.8571	17.8133	24.1064
						14	9			7.9663	17.3072	22.4209
						16	10			8.0754	16.9149	20.2846
						14	14			8.1845	17.352	19.3688
						9	13			8.2937	17.3126	18.3362
						16	10			8.4028	17.2941	17.5156
						16	7			8.5119	17.3233	17.565
						14	12			8.621	17.004	18.0385
						8	12			8.7302	17.377	18.2849
						10	14			8.8393	17.5095	19.344
						9	10			8.9484	17.5479	19.5578
						16	7			9.0575	17.9312	19.5408
						10	11			9.1667	18.1031	19.4178
						5	14			9.2758	18.4419	18.8412
						7	12			9.3849	19.067	18.3896
						8	11			9.494	19.3869	18.6268
						8	14			9.6032	20.3607	19.4816
						14	14			9.7123	21.4991	20.1088
										9.8214	21.1027	19.7324
										9.9306	19.9343	19.4573
										10.0397	19.0119	19.0685
										10.1488	19.0876	19.1286
										10.2579	18.5705	19.0228
										10.3671	18.3129	19.3039
										10.4762	17.9496	19.8331
										10.5853	17.6154	20.3819
										10.6944	17.3031	21.4348
										10.8036	18.0903	22.2907
										10.9127	18.5964	22.4312
										11.0218	18.7905	22.6673
										11.131	19.716	22.7712
										11.2401	19.2783	22.7232
										11.3492	20.072	22.5146
										11.4583	20.7206	21.5915
										11.5675	20.8849	21.2366
										11.6766	21.2643	21.1662
										11.7857	21.8576	20.0693
										11.8948	21.6383	20.3147
										12.004	21.7314	19.9238
										12.1131	21.2843	20.071
										12.2222	22.0101	20.17
										12.3313	21.7266	19.1633
										12.4405	21.1879	18.9783
										12.5496	21.0652	17.7084
										12.6587	21.0843	17.228
										12.7679	21.8919	17.6587
										12.877	22.9577	18.4582
										12.9861	25.2311	19.038
										13.0952	26.4688	20.0368
										13.2044	27.0487	20.2639
										13.3135	27.4555	20.9714
										13.4226	26.9412	21.9945
										13.5317	27.6636	23.634
										13.6409	27.179	24.1925
										13.75	27.1894	23.9833
										13.8591	26.8354	22.9229
										13.9683	27.1994	22.1128
										14.0774	27.2167	21.4934
										14.1865	26.8042	20.8042
										14.2956	26.6698	20.7724
										14.4048	25.8802	21.3542
										14.5139	26.5798	22.7896
										14.623	28.0816	24.8609
										14.7321	30.1452	27.328
										14.8413	34.0718	31.3638
										14.9504	37.9369	38.2314
										15.0595	38.5856	43.5546
										15.1687	36.4946	47.1884
										15.2778	33.804	45.138
										15.3869	30.4441	40.2772
										15.496	30.0219	34.1353
										15.6052	31.001	30.5343
										15.7143	30.7659	30.1346
										15.8234	30.9935	29.5974
										15.9325	30.9673	28.0205
										16.0417	32.5634	27.2565
										16.1508	33.6	26.7498
										16.2599	35.6311	26.8725
										16.369	36.9906	27.637
										16.4782	38.129	29.8072
										16.5873	39.3203	32.4904
										16.6964	40.565	35.2664
										16.8056	42.4744	39.2532
										16.9147	44.6201	42.6471
										17.0238	46.8463	46.8586
										17.1329	49.7282	50.8266
										17.2421	55.6281	54.7637
										17.3512	63.2351	60.3349
										17.4603	70.7734	67.1493
										17.5694	74.2267	74.4608
										17.6786	72.3827	79.0077
										17.7877	68.4418	78.9533
										17.8968	62.4592	74.6512
										18.006	57.2038	67.6435
										18.1151	54.7732	59.8793
										18.2242	56.2421	53.8124
										18.3333	57.9163	51.8206
										18.4425	58.7977	52.4264
										18.5516	60.2634	53.8582
										18.6607	59.7347	55.455
										18.7698	58.5935	58.4618
										18.879	54.9628	60.0859
										18.9881	51.46	59.6831
										19.0972	50.5707	57.9029
										19.2063	50.7372	54.1184
										19.3155	50.9068	51.082
										19.4246	50.5477	49.0692
										19.5337	51.207	49.1128
										19.6429	51.5077	48.4922
										19.752	51.8631	47.9758
										19.8611	52.6042	46.8979
										19.9702	54.1987	46.7155
										20.0794	54.6024	47.7777
										20.1885	54.6275	49.6382
										20.2976	53.6184	51.6752
										20.4067	51.8217	52.5701
										20.5159	50.4451	50.8366
										20.625	49.0842	48.0791
										20.7341	47.2315	45.3163
										20.8433	46.7953	43.3924
										20.9524	47.0996	42.3402
										21.0615	47.6691	41.3053
										21.1706	48.3107	40.701
										21.2798	49.8642	40.1127
										21.3889	51.8396	39.9813
										21.498	53.5604	40.1953
										21.6071	56.181	41.2939
										21.7163	59.2359	42.1418
										21.8254	61.6782	44.5588
										21.9345	67.0665	48.7466
										22.0437	77.0109	55.322
										22.1528	89.3688	61.2313
										22.2619	99.0785	66.2692
										22.371	105.407	72.024
										22.4802	103.025	75.3031
										22.5893	92.1537	74.7366
