# Supplementary material for: A high-resolution analysis of arrestin2 interactions responsible for CCR5 endocytosis
Source: eLife. 2026 Jan 19;14:RP106839. doi: 10.7554/eLife.106839 (PMC12815460; doi:10.7554/eLife.106839)
Supplement: Figure 5—figure supplement 1—source data 1. [file elife-106839-fig5-figsupp1-data1.xlsx]

## Sheet: Sheet1
Mander's coefficient				CCR5+ / arr2+ puncta				CCR5+ puncta
arr2	arr2 ΔLIELD			arr2	arr2 ΔLIELD			arr2	arr2 ΔLIELD
0.733	0.922			15	10			19	15
0.922	0.655			18	10			12	11
0.755	0.803			10	15			8	11
0.902	0.917			10	14			14	7
0.753	0.735			14	17			12	10
0.53	0.951			10	11			18	16
0.323	0.775			8	12			10	6
0.613	0.812			17	15			14	18
0.998	0.858			12	13			16	12
0.934	0.822			11	14			13	11
0.88	0.856			15	14			18	9
0.86	0.829			12	12			11	13
0.775	0.483			20	9			16	17
0.894	0.755			12	12			8	14
1	0.968			9	10			10	15
0.949	0.77			14	7			14	9
0.485	0.888			11	17			9	13
0.92	0.834			11	11			17	9
0.959	0.882			14	13			12	14
0.845	0.895			10	8			11	15
0.585	0.872			10	11			12	11
0.624	0.841			14	15			11	11
0.798	0.755			13	16			11	14
0.822	0.874			12	12			12	12
0.743	0.913			10	10			14	19
0.848	0.476			15	18			17	10
0.931	0.797			13	10			13	11
0.968	0.935			14	10			11	10
0.722	0.728			9	12			10	11
0.794	0.978			12	6			8	11
0.789	0.935			9	11			12	14
0.653	0.877			10	14			11	18
0.676	0.551			9	16			15	12
0.679	0.886			10	11			12	12
0.732	0.657			11	12			13	11
0.829	0.869			11	10			10	10
0.798	0.887			18	10			13	12
0.771	0.631			19	16			11	13
0.756	0.552			11	10			17	19
0.73	0.902			10	11			18	11
0.902	0.802			9	13			14	11
0.56	0.645			15	11			19	10
0.851	0.497			12	17			8	11
0.884	0.767			10	15			12	9
0.839	0.572			9	7			12	9
				7	11			14	11
				12	12			11	13
				7	9			13	10
				13	10			16	8
				14	13			16	14
				11	10			8	14
				17	13			12	10
				17	14			9	8
				12	9			10	11
				15	12			9	16
				12	15			6	14
				18	7			9	7
				14	12			11	6
				13	13			10	16
				10	13			13	12
				10	11			11	6
				14	14			10	13
				13	11			14	13
				17	6			12	16
				15	14			11	7
				12	14			13	17
				15	10			15	10
				9	15			18	21
				9	9			19	10
				11	15			11	15
				18	11			20	11
				12	13			15	12
				15	13			11	17
				9	13			14	8
				10	15			16	12
				14	12			14	10
				13	11			9	12
				10	11			16	11
				7	16			16	9
				12	8			14	13
				12	12			8	7
				14	12			10	16
				10	12			9	10
				7	13			16	20
				11	9			10	14
				14	11			5	11
				12	9			7	12
				11	15			8	10
				14	12			8	9
				14	10			14	11
