# Supplementary material for: A high-resolution analysis of arrestin2 interactions responsible for CCR5 endocytosis
Source: eLife. 2026 Jan 19;14:RP106839. doi: 10.7554/eLife.106839 (PMC12815460; doi:10.7554/eLife.106839)
Supplement: Figure 5—figure supplement 1—source data 2. [file elife-106839-fig5-figsupp1-data2.xlsx]

## Sheet: Sheet1
Mander's coefficient				CCR5+ / arr2+ puncta				CCR5+ puncta
arr2	arr2 ΔAP2			arr2	arr2 ΔAP2			arr2	arr2 ΔAP2
0.596	0.325			14	7			9	6
0.809	0.132			13	7			11	12
0.643	0.388			14	4			19	3
0.766	0.015			12	6			10	9
0.784	0.063			13	4			13	14
0.903	0.572			13	8			16	7
0.847	0.22			10	6			12	6
0.9	0.154			15	3			12	1
0.92	0.129			9	7			9	11
0.946	0.067			16	7			21	3
0.82	0.178			15	9			15	8
0.812	0.38			10	8			10	10
0.92	0.283			13	7			16	4
0.916	0.047			18	5			11	4
0.857	0.083			15	6			16	8
0.735	0.073			11	11			9	5
0.792	0.275			12	4			4	2
0.878	0.296			11	13			11	2
0.702	0.191			8	4			10	3
0.84	0.159			14	5			15	6
0.99	0.415			13	6			18	4
0.95	0.204			11	3			13	5
0.92	0.182			10	1			13	2
0.933	0.542			11	5			10	6
0.957	0.265			12	6			17	12
0.738	0.449			15	6			11	4
0.641	0.158			13	5			17	4
0.896	0.062			12	7			9	6
0.771	0.3			14	10			8	5
0.394	0.173			12	8			12	8
0.815	0.072			14	5			12	6
0.67	0.129			12	8			15	8
0.424	0.011			12	5			21	7
0.832	0.133			20	8			12	4
0.594	0.21			13	8			17	13
0.557	0.148			12	6			24	1
0.702	0.221			15	7			11	4
0.862	0.497			15	9			12	6
0.523	0.098			11	8			17	3
0.63	0.348			19	6			9	4
0.919	0.251			13	7			13	8
0.615	0.098			12	6			12	4
0.727	0.007			18	7			9	5
0.652	0.429			12	5			11	10
0.796	0.328			13	6			15	11
				15	3			10	2
				19	4			17	5
				15	5			14	5
				12	7			7	2
				9	8			15	6
				16	2			19	8
				16	5			15	2
				12	6			11	9
				17	4			15	9
				13	8			10	14
				14	10			11	4
				9	7			10	7
				13	7			10	8
				14	11			16	7
				10	9			16	8
				16	6			18	4
				18	5			11	6
				16	2			12	1
				13	2			9	4
				14	1			18	12
				22	4			19	10
				13	7			18	6
				15	7			12	10
				12	4			18	5
				10	5			19	7
				11	8			10	3
				10	7			19	6
				18	7			17	2
				15	10			11	9
				13	7			13	10
				10	11			13	7
				16	10			15	8
				18	7			16	11
				16	5			17	10
				17	7			17	5
				14	7			20	5
				14	9			12	2
				14	10			10	1
				15	8			11	11
				18	7			16	14
				24	8			15	5
				14	8			4	9
				13	8			10	7
				13	9			13	9
				10	8			15	4
