# Supplementary material for: A high-resolution analysis of arrestin2 interactions responsible for CCR5 endocytosis
Source: eLife. 2026 Jan 19;14:RP106839. doi: 10.7554/eLife.106839 (PMC12815460; doi:10.7554/eLife.106839)
Supplement: Figure 5—source data 1. [file elife-106839-fig5-data1.xlsx]

## Sheet: Sheet1
Panel B					Panel C
arr2	arr2 ΔLIELD	arr2 R395A	arr2 ΔAP2		arr2	arr2 ΔLIELD	arr2 R395A	arr2 ΔAP2
22	24	15	4		26	24	17	9
8	19	14	6		15	21	18	7
20	23	23	6		21	23	25	9
14	11	13	10		15	12	15	11
13	26	14	10		16	26	18	11
15	18	9	11		17	20	15	11
23	13	19	11		23	14	19	11
20	22	12	6		23	25	13	9
20	18	20	2		21	19	21	8
15	13	17	9		17	15	20	13
14	17	24	11		24	18	26	12
21	10	17	3		23	12	17	5
18	17	18	11		20	19	18	14
25	20	25	3		26	20	27	5
19	17	27	5		22	20	30	5
17	17	16	1		18	17	16	1
19	19	15	7		19	20	16	7
17	33	16	6		18	33	20	6
27	17	21	11		31	20	22	11
19	18	28	6		19	21	28	10
22	23	16	14		24	27	17	14
10	26	21	13		12	31	23	15
21	26	22	12		21	27	25	12
25	14	21	4		25	17	22	6
20	18	10	5		20	24	12	5
19	13	21	4		22	15	25	4
16	18	15	5		17	20	15	5
19	12	19	12		23	13	20	12
25	12	10	2		27	12	10	3
19	22	24	3		19	25	25	5
14	12	18	6		16	12	18	6
16	20	28	15		16	21	32	15
16	24	23	12		18	24	27	12
17	17	16	6		18	18	17	7
19	21	17	13		22	23	19	13
15	18	17	7		18	20	21	8
19	20	22	7		19	21	27	7
17	27	24	7		17	27	24	7
31	21	22	6		33	22	22	6
21	27	22	12		21	28	23	13
16	24	14	15		16	24	17	15
22	22	16	14		25	23	19	14
21	21	19	10		21	21	21	13
15	16	20	8		18	17	20	8
20	21	9	2		20	22	10	6
22	16	20	7		23	18	23	8
18	16	16	4		22	18	20	4
14	26	12	9		15	27	17	10
23	22	17	16		23	22	17	17
14	27	17	11		14	27	20	15
22	16	17	9		25	18	18	11
23	25	11	2		24	27	14	2
16	15	24	3		17	15	27	3
16	18	23	1		16	21	23	1
27	19	18	6		27	20	21	6
23	18	18	9		23	20	18	11
18	22	27	1		20	25	28	1
21	16	25	6		21	17	25	7
23	19	26	6		23	19	27	11
21	21	20	7		25	25	21	7
25	20	24	15		26	20	24	15
26	26	22	14		26	29	22	15
24	34	23	15		25	34	23	18
21	21	32	6		22	23	32	10
31	12	18	8		32	16	21	9
12	19	18	5		15	21	23	7
14	15	19	9		18	20	19	13
18	28	31	9		22	30	31	11
17	14	21	9		17	15	21	14
23	21	14	11		23	21	15	12
28	29	24	7		32	29	24	11
26	15	18	12		28	15	20	15
22	18	19	8		23	18	20	8
24	21	21	9		25	23	24	11
27	24	16	3		29	27	22	5
19	17	20	13		19	18	23	15
23	24	19	12		24	24	19	12
16	33	23	5		18	34	26	5
20	21	16	12		22	23	18	12
23	27	20	2		25	27	22	5
32	16	30	12		33	16	31	13
16	16	34	6		18	19	34	6
18	28	31	7		18	32	32	7
18	20	23	8		18	24	25	8
19	19	16	12		21	24	16	12
25	26	21	4		28	30	21	6
18	27	23	7		18	29	24	7
15	18	31	11		15	18	32	11
19	28	19	12		20	30	20	13
28	23	25	5		30	24	28	8
