# Supplementary figures and images for: A high-resolution analysis of arrestin2 interactions responsible for CCR5 endocytosis
Source: eLife journal article supplement (doi:10.7554/elife.106839), 2025-07-09

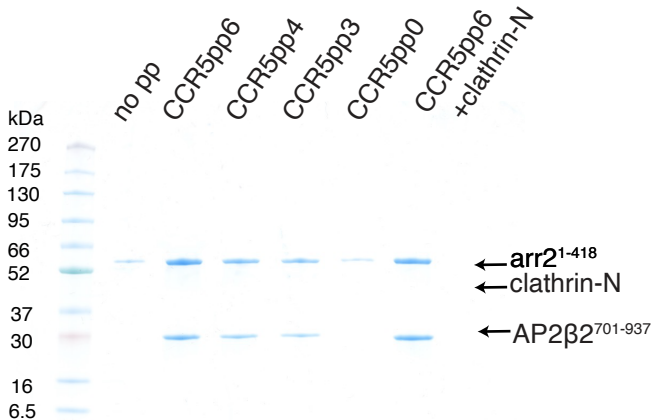

Supplement: fig3-figsupp2-data1 [file FigureS5_v10.pdf › FIGURE_3_FIGURE_SUPPLEMENT_2_SOURCE_DATA_1/FigureS5_v10.pdf]
